# Supplementary material for: The effect of pre-anaesthetic assessment clinic: a systematic review of randomised and non-randomised prospective controlled studies
Source: bioRxiv or medRxiv preprint supplement (doi:10.1101/2021.06.04.21258364), 2021-06-07
Supplement: Supplementary file [file media-1.pdf]

Database: Ovid MEDLINE(R) ALL <1946 to February 03, 2020>

Search Strategy:

- 
- 1 ((pre-operativ\* or preoperativ\* or pre operativ\*) and (assessment\* or measurement\* or evaluat\*)).ti. (6182)
  - 2 (clinic\* or unit\* or nurs\* or outpatient\* or ward\* or center\* or centre\*).ti. (1472922)
  - 3 1 and 2 (478)
  - 4 ((preanaesthe\* or pre-anaesthe\* or pre anaesthe\* or pre-anesthe\* or preanesthe\* or pre anesthe\*) adj4 (assessment\* or measurement\* or evaluat\* or clinic\* or nurs\* or unit\* or outpatient\* or ward\* or center\* or centre\*)).ti,ab. (572)
  - 5 (((pre-admiss\* or preadmiss\*) adj4 (assessment\* or measurement\* or evaluat\* or clinic\* or unit\* or nurs\* or outpatient\* or ward\* or centre\* or center\*)) and (surg\* or anaesthe\* or anesthe\* or preoperativ\* or pre-operativ\* or preanaesthe\* or pre-anaesthe\* or pre anaesthe\* or pre-anesthe\* or preanesthe\* or pre anesthe\*)).ti,ab. (241)
  - 6 ((anaesthe\* or anasthe\* or anesthe\*) adj4 outpatient\* adj4 clinic\*).ti,ab. (138)
  - 7 ((pre-admiss\* or preadmiss\*) adj4 (center\* or centre\*) adj4 (evaluat\* or assessment\* or measurement\*)).ti,ab. (4)
  - 8 or/3-7 (1409)
  - 9 limit 8 to yr="1996 -Current" (1105)

\*\*\*\*\*
